# Supplementary material for: Spindle Assembly Checkpoint Inhibition Can Resensitize p53-Null Stem Cells to Cancer Chemotherapy
Source: Oxford University Press journal article supplement (doi:10.1158/0008-5472.can-18-3024), 2019-03-12
Supplement: 00085472can183024-sup-209379_2_supp_5366195_pnhx2w.docx [file 00085472can183024-sup-209379_2_supp_5366195_pnhx2w.docx]

Table S2. TP53 knockout ESCs resistant drugs

| Drug Name | TP53-WT-ESC AUC | TP53-KO-ESC AUC | log of ratio WT-AUC/KO-AUC | p_value |
| --- | --- | --- | --- | --- |
| Bendamustine hydrochloride | 4.59 | 8.93 | -0.29 | 0.001036686 |
| Bleomycin sulfate | 1.51 | 6.51 | -0.63 | 0.000507888 |
| Carboplatin | 3.57 | 7.73 | -0.34 | 0.003424382 |
| Carmustine | 4.93 | 7.87 | -0.20 | 0.004832559 |
| Chlorambucil | 1.94 | 6.14 | -0.50 | 0.004078277 |
| Cisplatin | 1.49 | 5.04 | -0.53 | 0.003049235 |
| Cladribine | 1.70 | 5.30 | -0.50 | 0.003869403 |
| Clofarabine | 1.61 | 4.50 | -0.45 | 0.003201266 |
| Cytarabine hydrochloride | 1.64 | 4.76 | -0.46 | 0.003577124 |
| Decitabine | 1.42 | 6.15 | -0.64 | 0.003050466 |
| Dexrazoxane | 3.70 | 8.70 | -0.37 | 0.000281655 |
| Estramustine phosphate sodium | 2.42 | 3.43 | -0.15 | 0.000599407 |
| Etoposide | 1.31 | 5.89 | -0.65 | 0.001379258 |
| Irinotecan hydrochloride | 1.80 | 7.68 | -0.63 | 0.000374108 |
| Melphalan hydrochloride | 2.19 | 6.83 | -0.49 | 5.09E-06 |
| Mitomycin | 2.59 | 4.94 | -0.28 | 0.000148541 |
| Olaparib | 2.50 | 6.28 | -0.40 | 0.002871274 |
| Osimertinib | 2.05 | 3.17 | -0.19 | 0.001899473 |
| Oxaliplatin | 1.86 | 5.41 | -0.46 | 0.00508962 |
| Pipobroman | 2.98 | 8.22 | -0.44 | 0.004948675 |
| Teniposide | 2.40 | 3.57 | -0.17 | 0.000876596 |
| Thiotepa | 3.23 | 7.48 | -0.36 | 0.001487633 |
| Topotecan hydrochloride | 2.64 | 5.13 | -0.29 | 0.000513241 |
| Triethylenemelamine | 2.75 | 7.08 | -0.41 | 0.000680548 |
| Trifluridine | 4.11 | 8.31 | -0.31 | 7.15E-05 |
| Uracil mustard | 3.17 | 8.02 | -0.40 | 0.001353984 |
| Valrubicin | 2.72 | 4.12 | -0.18 | 5.77E-05 |
